# Supplementary material for: Distribution Dynamics of Diplopanax stachyanthus Hand.-Mazz. (Mastixiaceae) and Its Implications in Relict Mastixioid Flora Conservation
Source: MDPI journal article supplement (doi:10.3390/f15050766), 2024-04-27
Supplement: s1 [file s1]

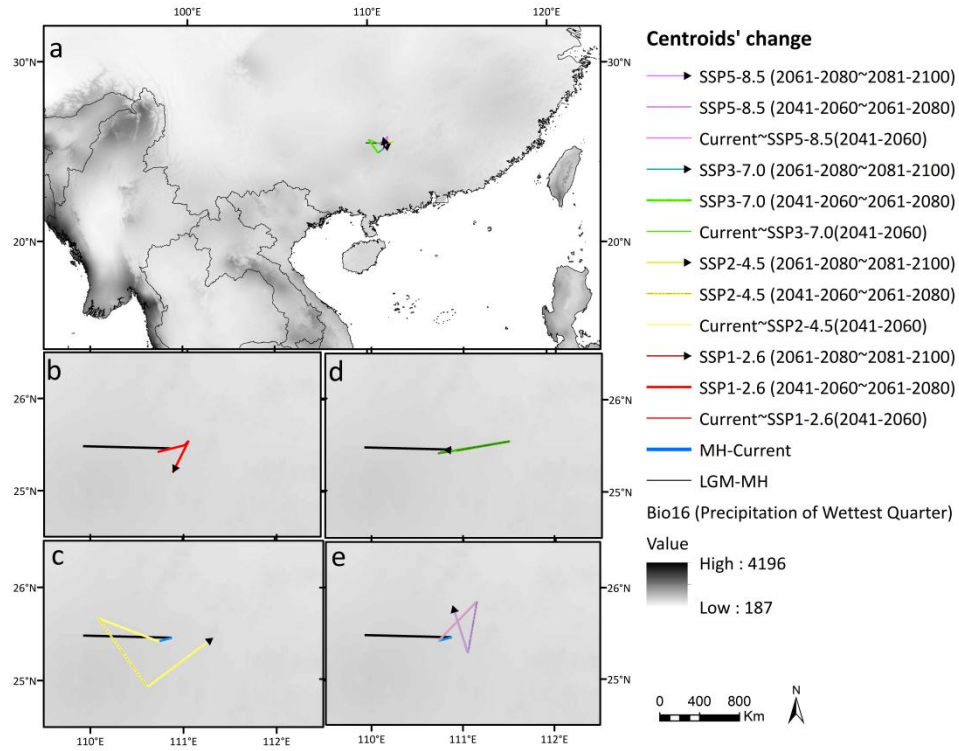

Figure S1. The centroid distribution of *D. stachyanthus* in different periods.(a)The predicted shift in the distribution centroids of *D. stachyanthus* from the LGM to 2081–2100. (b) The predicted shift in the distribution centroids of *D. stachyanthus* from the LGM to SSP1-2.6 (2081–2100). (c) The predicted shift in the distribution centroids of *D. stachyanthus* from the LGM to SSP2-4.5 (2081–2100). (d) The predicted shift in the distribution centroids of *D. stachyanthus* from the LGM to SSP3-7.0 (2081–2100). (e) The predicted shift in the distribution centroids of *D. stachyanthus* from the LGM to SSP5-8.5 (2081–2100).
